# Supplementary material for: The Effect of Ultrasound on the Extraction and Functionality of Proteins from Duckweed (Lemna minor)
Source: MDPI journal article supplement (doi:10.3390/molecules29051122), 2024-03-01
Supplement: s1 [file s1]

*Supplementary Material*

*for*

# **The Effect of Ultrasound on the Extraction and Functionality of Proteins from Duckweed (*Lemna minor*)**

**Vicente Antonio Mirón-Mérida <sup>1</sup>, Cintya Soria-Hernández <sup>1,\*</sup>, Alejandro Richards-Chávez <sup>1</sup>, Juan Carlos Ochoa-García <sup>1</sup>, Jorge Luis Rodríguez-López <sup>1</sup> and Cristina Chuck-Hernández <sup>2,\*</sup>**

<sup>1</sup> Escuela de Ingeniería y Ciencias, Tecnológico de Monterrey, Av. Eugenio Garza Sada 2501, Colonia Tecnológico, Monterrey 64700, Mexico

<sup>2</sup> Instituto para la Investigación en Obesidad, Tecnológico de Monterrey, Av. Eugenio Garza Sada 2501, Sur Tecnológico, Monterrey 64849, Mexico

\* Correspondence: cintya.soria@tec.mx (C.S.-H.); cristina.chuck@tec.mx (C.C.-H.)

## ***Content***

1. Table S1. Analysis of Variance for the response surface regression of the extract yield.
2. Figure S1. Pareto chart of the standardized effects on the extract yield.
3. Table S2. Analysis of Variance for the response surface regression of the protein content.
4. Figure S2. Pareto chart of the standardized effects on the protein content.
5. Table S3. Analysis of Variance for the response surface regression of the protein yield.
6. Figure S3. Pareto chart of the standardized effects on the protein yield.
7. Figure S4. Emulsions produced with (a) duckweed, (b) control protein extract, and (c) ultrasound protein extract.

**Table S1.** Analysis of Variance for the response surface regression of the extract yield.

| Source              | DF | Adj SS  | Adj MS  | F-Value | P-Value |
|---------------------|----|---------|---------|---------|---------|
| Model               | 9  | 19575.2 | 2175.0  | 50.32   | 0.000   |
| Linear              | 3  | 13662.4 | 4554.1  | 105.36  | 0.000   |
| pH                  | 1  | 13207.2 | 13207.2 | 305.54  | 0.000   |
| Amplitude           | 1  | 17.2    | 17.2    | 0.40    | 0.535   |
| Time                | 1  | 438.1   | 438.1   | 10.13   | 0.005   |
| Square              | 3  | 5064.3  | 1688.1  | 39.05   | 0.000   |
| pH*pH               | 1  | 4862.9  | 4862.9  | 112.50  | 0.000   |
| Amplitude*Amplitude | 1  | 21.3    | 21.3    | 0.49    | 0.491   |
| Time*Time           | 1  | 77.1    | 77.1    | 1.78    | 0.197   |
| 2-Way Interaction   | 3  | 848.5   | 282.8   | 6.54    | 0.003   |
| pH*Amplitude        | 1  | 26.3    | 26.3    | 0.61    | 0.445   |
| pH*Time             | 1  | 821.5   | 821.5   | 19.01   | 0.000   |
| Amplitude*Time      | 1  | 0.6     | 0.6     | 0.01    | 0.904   |
| Error               | 20 | 864.5   | 43.2    |         |         |
| Lack-of-Fit         | 3  | 419.2   | 139.7   | 5.33    | 0.009   |
| Pure Error          | 17 | 445.3   | 26.2    |         |         |
| Total               | 29 | 20439.8 |         |         |         |

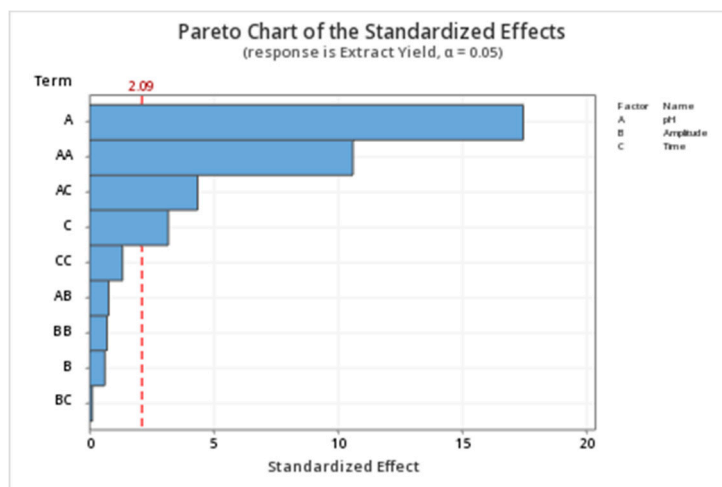

**Figure S1.** Pareto chart of the standardized effects on the extract yield.

**Table S2.** Analysis of Variance for the response surface regression of the protein content.

| Source              | DF | Adj SS  | Adj MS  | F-Value | P-Value |
|---------------------|----|---------|---------|---------|---------|
| Model               | 9  | 2425.32 | 269.48  | 14.43   | 0.000   |
| Linear              | 3  | 1614.21 | 538.07  | 28.82   | 0.000   |
| pH                  | 1  | 1548.62 | 1548.62 | 82.93   | 0.000   |
| Amplitude           | 1  | 8.51    | 8.51    | 0.46    | 0.507   |
| Time                | 1  | 57.08   | 57.08   | 3.06    | 0.096   |
| Square              | 3  | 773.21  | 257.74  | 13.80   | 0.000   |
| pH*pH               | 1  | 746.33  | 746.33  | 39.97   | 0.000   |
| Amplitude*Amplitude | 1  | 5.02    | 5.02    | 0.27    | 0.610   |
| Time*Time           | 1  | 1.01    | 1.01    | 0.05    | 0.818   |
| 2-Way Interaction   | 3  | 37.90   | 12.63   | 0.68    | 0.577   |
| pH*Amplitude        | 1  | 16.56   | 16.56   | 0.89    | 0.358   |
| pH*Time             | 1  | 18.24   | 18.24   | 0.98    | 0.335   |
| Amplitude*Time      | 1  | 3.10    | 3.10    | 0.17    | 0.688   |
| Error               | 20 | 373.46  | 18.67   |         |         |
| Lack-of-Fit         | 3  | 63.63   | 21.21   | 1.16    | 0.353   |
| Pure Error          | 17 | 309.83  | 18.23   |         |         |
| Total               | 29 | 2798.77 |         |         |         |

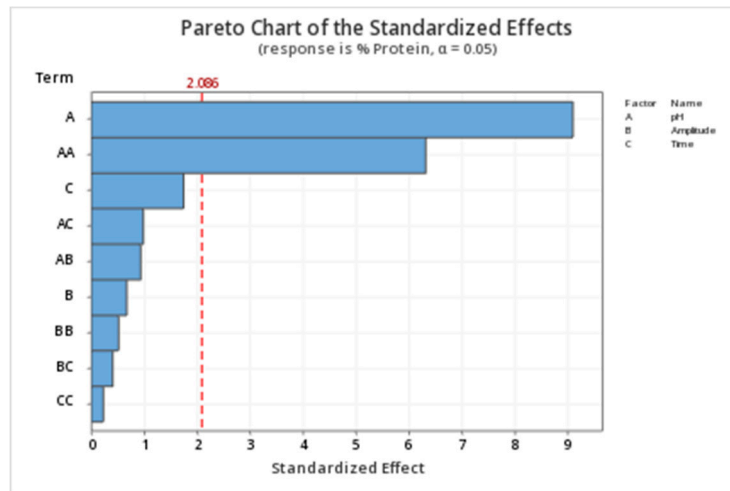

**Figure S2.** Pareto chart of the standardized effects on the protein content.

**Table S3.** Analysis of Variance for the response surface regression of the protein yield.

| Source              | DF | Adj SS  | Adj MS  | F-Value | P-Value |
|---------------------|----|---------|---------|---------|---------|
| Model               | 9  | 3787.97 | 420.89  | 14.43   | 0.000   |
| Linear              | 3  | 3025.84 | 1008.61 | 34.57   | 0.000   |
| pH                  | 1  | 2871.43 | 2871.43 | 98.42   | 0.000   |
| Amplitude           | 1  | 115.55  | 115.55  | 3.96    | 0.060   |
| Time                | 1  | 38.86   | 38.86   | 1.33    | 0.262   |
| Square              | 3  | 496.47  | 165.49  | 5.67    | 0.006   |
| pH*pH               | 1  | 406.26  | 406.26  | 13.93   | 0.001   |
| Amplitude*Amplitude | 1  | 54.67   | 54.67   | 1.87    | 0.186   |
| Time*Time           | 1  | 16.11   | 16.11   | 0.55    | 0.466   |
| 2-Way Interaction   | 3  | 265.66  | 88.55   | 3.04    | 0.053   |
| pH*Amplitude        | 1  | 130.74  | 130.74  | 4.48    | 0.047   |
| pH*Time             | 1  | 123.23  | 123.23  | 4.22    | 0.053   |
| Amplitude*Time      | 1  | 11.70   | 11.70   | 0.40    | 0.534   |
| Error               | 20 | 583.49  | 29.17   |         |         |
| Lack-of-Fit         | 3  | 35.68   | 11.89   | 0.37    | 0.776   |
| Pure Error          | 17 | 547.81  | 32.22   |         |         |
| Total               | 29 | 4371.45 |         |         |         |

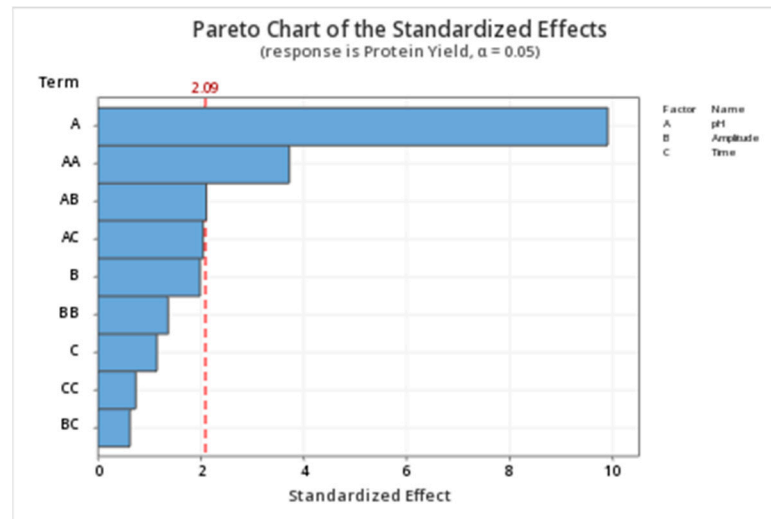

**Figure S3 .** Pareto chart o the standardized effects on the protein yield.

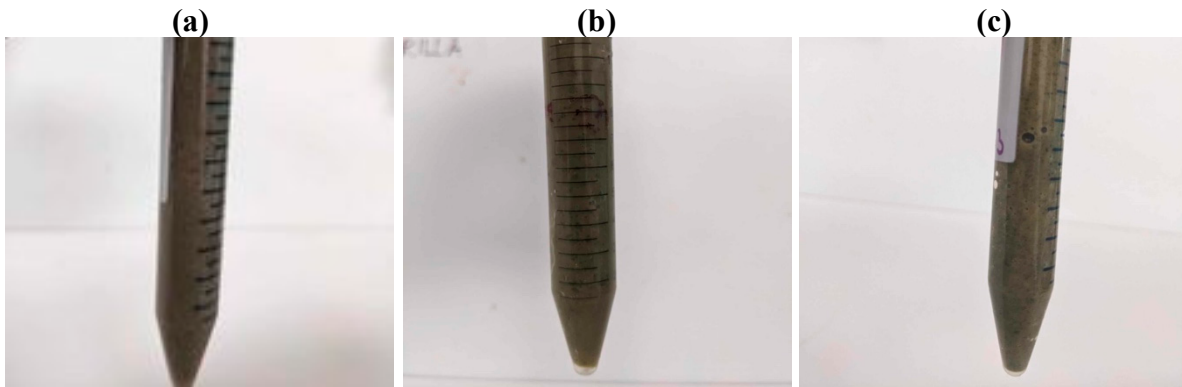

**Figure S4.** Emulsions produced with (a) duckweed flour, (b) control protein extract, and (c) ultrasound protein extract.
